# Supplementary material for: Optimization of cDNA microarrays procedures using criteria that do not rely on external standards
Source: Springer Nature journal article supplement (doi:10.1186/1471-2164-8-377), 2007-01-01
Supplement: Additional file 1 [file 1471-2164-8-377-s1.pdf]

## Additional file 1

**Table S1: Number of differentially expressed genes under different blocking, background correction and levels of filtration**

| Background correction    | Blocker                           | Levels of filtration |        |      |             |        |
|--------------------------|-----------------------------------|----------------------|--------|------|-------------|--------|
|                          |                                   | coarse               | medium | fine | uncertainty | weight |
| <b>none</b>              | no blocker                        | 122                  | 115    | 9    | 121         | 167    |
|                          | 1000 ng Poly(dA) <sub>40-60</sub> | 420                  | 409    | 355  | 420         | 588    |
|                          | 25 ng LNA                         | 497                  | 484    | 100  | 546         | 921    |
|                          | 250 ng LNA                        | 1510                 | 1488   | 515  | 1673        | 2064   |
|                          | 500 ng LNA                        | 983                  | 980    | 963  | 995         | 1162   |
|                          | 1000 ng LNA                       | 1185                 | 1160   | 420  | 1360        | 1766   |
| <b>Edwards /dampened</b> | no blocker                        | 28                   | 27     | 10   | 27          | 40     |
|                          | 1000 ng Poly(dA) <sub>40-60</sub> | 289                  | 287    | 209  | 284         | 340    |
|                          | 25 ng LNA                         | 11                   | 10     | 67   | 11          | 67     |
|                          | 250 ng LNA                        | 455                  | 451    | 191  | 545         | 588    |
|                          | 500 ng LNA                        | 334                  | 334    | 810  | 367         | 403    |
|                          | 1000 ng LNA                       | 382                  | 381    | 484  | 374         | 431    |
| <b>Edwards</b>           | no blocker                        | 1                    | 1      | 11   | 1           | 1      |
|                          | 1000 ng Poly(dA) <sub>40-60</sub> | 16                   | 15     | 203  | 16          | 16     |
|                          | 25 ng LNA                         | 0                    | 0      | 65   | 0           | 0      |
|                          | 250 ng LNA                        | 68                   | 72     | 144  | 66          | 120    |
|                          | 500 ng LNA                        | 5                    | 4      | 605  | 4           | 1      |
|                          | 1000 ng LNA                       | 2                    | 1      | 393  | 2           | 47     |
